# Supplementary material for: Single-cell analysis of salt-induced hypertensive mouse aortae reveals cellular heterogeneity and state changes
Source: PubMed Central journal article supplement (PMC8741768; doi:10.1038/s12276-021-00704-w), 2021-12-03
Supplement: 12276_2021_704_MOESM1_ESM.pdf [file 12276_2021_704_MOESM1_ESM.pdf]

## **SUPPLEMENTAL MATERIAL**

### **Single-cell analysis of salt-induced hypertensive mouse aorta reveals cellular heterogeneity and state changes**

Ka Zhang<sup>#,1</sup>, Hao Kan<sup>#,1</sup>, Aiqin Mao<sup>#,1</sup>, Li Geng<sup>1</sup>, Xin Ma<sup>\*,1</sup>

<sup>1</sup>Wuxi School of Medicine, Jiangnan University, Wuxi, China

<sup>#</sup>These authors contributed equally to this study.

\* Correspondence author

**Supplemental Table 1: EC subpopulation features (or functions) gene lists**

| Inflammator<br>y response to<br>wounding | Lymph vessel<br>development | Migration |          |         |         |         | Lipid<br>transport |
|------------------------------------------|-----------------------------|-----------|----------|---------|---------|---------|--------------------|
| Grn                                      | Nr2f2                       | Ephb4     | Cyp1b1   | Vash1   | Card10  | Lgals8  | Cd36               |
| Ager                                     | Foxc1                       | Mef2c     | Plcg1    | Dcn     | Itgb3   | Cxcl13  | Mfsd2a             |
| Alox5                                    | Vegfc                       | Tgfr1     | Hmox1    | Clec14a | Adgra2  | Adam17  | ApoE               |
|                                          | Syk                         | Nus1      | Tnf      | Zc3h12a | Gata2   | Efnb2   | Slc27a4            |
|                                          | Lgals8                      | Pik3c2a   | SrpX2    | Vegfa   | TdGF1   | Try4    | Fabp5              |
|                                          | Foxc2                       | Smoc2     | Sox18    | Sp1     | Bmper   | Try5    | Slc27a1            |
|                                          | Efnb2                       | Stat5a    | Nr4a1    | Pdcd6   | Rhoa    | Try10   |                    |
|                                          | Ppp3cb                      | Rhob      | Prkca    | Prkx    | Rras    | Prss3   |                    |
|                                          | Tmem204                     | Rock2     | Ceacam10 | EfnA1   | Nr2e1   | Gm5771  |                    |
|                                          | Tbx1                        | Mmrn2     | Ceacam2  | Gpi1    | Hrg     | Gm10334 |                    |
|                                          | Heg1                        | Atp2b4    | Ceacam1  | Pten    | Ptk2b   | Prss1   |                    |
|                                          | Ptpn14                      | Fgfr1     | Stc1     | Csnk2b  | Rhoj    | Prss2   |                    |
|                                          | Flt4                        | Pxn       | Egr3     | Scarb1  | Gm42906 | Adtrp   |                    |
|                                          | Ccbe1                       | Grn       | Apoa1    | Hif1a   | Stard13 | Gadd45a |                    |
|                                          | Pkd1                        | Atp5b     | Loxl2    | Ets1    | Dpp4    | Adgrb1  |                    |
|                                          | Pdpn                        | Tgfb1     | Acvrl1   | Aamp    | Notch1  | Fgf4    |                    |
|                                          | Lgals12                     | Hmgb1     | P2rx4    | Gata3   | Gpx1    | Hdac7   |                    |
|                                          | Epha2                       | Fgfl      | Ptgs2    | Zfp580  | Anxa3   | Emp2    |                    |
|                                          | Bmpr2                       | Gpld1     | Robo1    | Angpt1  | Myh9    | Gdf2    |                    |
|                                          | Prox1                       | Cdh13     | Alox12   | Edn1    | Dnaja4  | Meox2   |                    |
|                                          | Sox18                       | Angpt2    | Sash1    | Map2k3  | Plk2    | Bmp10   |                    |
|                                          | Svep1                       | Wnt7a     | Nrp1     | Pdcd10  | Slit2   | Rin2    |                    |
|                                          | Acvrl1                      | Prp       | Akt1     | Met     | ApoH    | Pdgfb   |                    |
|                                          | Vash1                       | Wnt5a     | Mecp2    | Agtr2   | Tmsb4x  | Rgcc    |                    |
|                                          | Vegfa                       | Ptn       | Fgfl6    | Map3k3  | Gm49510 | Itgb2   |                    |
|                                          | Acvr2b                      | Hspb1     | Nrp2     | Gm49337 | Sh3bp1  | Itgb2l  |                    |
|                                          |                             | Fbxw7     | Akt3     | Paxip1  | Thbs1   | Ptprm   |                    |
|                                          |                             | Tnfsf12   | Amot     | Tek     | Agt     | Id1     |                    |
|                                          |                             | Dll4      | Epha2    | Lgmn    | Svbp    | Nf1     |                    |
|                                          |                             | Hdac9     | Dab2ip   | Grem1   | Jcad    | Atoh8   |                    |
|                                          |                             | Sema4a    | Pdprk1   | Fut1    | Ptk2    | Prkd1   |                    |
|                                          |                             | S100a2    | Adamts9  | Cib1    | Tbxa2r  | Lgals12 |                    |
|                                          |                             | Pik3ca    | Flt4     | Kdr     | Map2k5  | Srf     |                    |
|                                          |                             | Coro1b    | Fgf2     | Spred1  | Glul    | Rab13   |                    |
|                                          |                             | Cdh5      | Pecam1   | Prox1   | Bcar1   | Scg2    |                    |
|                                          |                             | Sema5a    | Anxa1    | Fap     | Ccbe1   | Plekhg5 |                    |
|                                          |                             | Jup       | Bmpr2    | Lpxn    | Pparg   | Gipc1   |                    |
|                                          |                             | Calr      | ApoE     | Sparc   | Itgb1   | Ccn3    |                    |
|                                          |                             | Sirt1     | Cd40     | Foxc2   | Amotl1  | Abi1    |                    |

|  |  |        |          |          |        |        |  |
|--|--|--------|----------|----------|--------|--------|--|
|  |  | Fgf18  | Plxnd1   | Angpt4   | Bcas3  | Hdac5  |  |
|  |  | Fgfbp1 | Atp5a1   | Itgb1bp1 | Klf4   | Nos3   |  |
|  |  | Krit1  | Prkd2    | Plpp3    | Vegfc  | Ptp4a3 |  |
|  |  | Nfe2l2 | Serpinf1 | Bmp4     | Pik3r3 | Nr2f2  |  |
|  |  | Emc10  |          |          |        |        |  |

| Contractile | Collagen | MHC protein complex | Proteoglycan | Differentiation | ROS-related enzymes | Proliferation |
|-------------|----------|---------------------|--------------|-----------------|---------------------|---------------|
| Actg2       | Col1a2   | B2m                 | Fmod         | Ccm2            | Nox1                | Itga4         |
| Tpm2        | Col4a2   | B2m                 | Prelp        | Dll1            | Nox4                | Mef2c         |
| Myo1d       | Col27a1  | Cd74                | Srgn         | Rbpj            | Nox2                | Stat3         |
| Myh11       | Col5a2   | Cd74                | Gpc3         | Hey2            | Nox3                | Ccl2          |
| Tpm4        | Col8a1   | H2-Aa               | Gpc4         | Tmem100         | Nox5                | Hmgb1         |
| Actb        | Col4a4   | H2-Aa               | Agtn         | Hey1            | Sod1                | Fgfr1         |
| Actg1       | Col4a3   | H2-Aa               | Gpc1         | Foxj2           | Sod2                | Pdpk1         |
| Myo19       | Col5a1   | H2-Ab1              | Sdc2         | Nrp1            | Sod3                | Sirt6         |
| Acta2       | Col4a1   | H2-Ab1              | Aspn         | Notch1          | Ptgs1               | Adam17        |
| Actc1       | Col3a1   | H2-D1               | Omd          |                 | Ptgs2               | Ghsr          |
| Tnnt3       | Col14a1  | H2-DMa              | Ogn          |                 | Cybb                | Col4a3        |
| Myo18a      | Col9a2   | H2-DMb1             | Lum          |                 | Xdh                 | Plcg1         |
| Myo9a       | Col6a1   | H2-DMb2             | Sdc3         |                 |                     | Igf2          |
| Myo1e       | Col16a1  | H2-Eb1              | Smc3         |                 |                     | Sp1           |
| Myh9        | Col28a1  | H2-K1               | Cd44         |                 |                     | Apln          |
| Myo1f       | Col5a3   | H2-L                | Bgn          |                 |                     | Fgf2          |
| Myo5c       | Col15a1  | H2-M3               | Sdc4         |                 |                     | Akt3          |
| Myo9b       | Col18a1  | H2-Oa               | Acan         |                 |                     | Pparg         |
| Myo6        | Col6a2   | H2-Ob               | Hspg2        |                 |                     | Ghrl          |
| Myo15b      | Col25a1  | H2-Q1               | Vcan         |                 |                     | Flt1          |
| Myh10       | Col6a3   | H2-Q2               | Podn         |                 |                     |               |
| Myo1c       | Col8a2   | H2-Q4               | Cspg4        |                 |                     |               |
| Tpm3        | Col12a1  | H2-Q6               | Tgfbr3       |                 |                     |               |
| Tpm3-rs7    | Col13a1  | H2-Q7               | Gpc6         |                 |                     |               |
| Myo1b       | Col1a1   | H2-Q9               | Dcn          |                 |                     |               |
| Myo5a       | Col4a5   | H2-Q10              |              |                 |                     |               |
| Myo10       |          | H2-T23              |              |                 |                     |               |
| Tpm1        |          | H2-T23              |              |                 |                     |               |
|             |          | Mr1                 |              |                 |                     |               |

**List of genes used to define EC subpopulation features (or functions) scores**

**Supplemental Table 2: contractile SMC markers gene list**

| <b>contractile SMC markers</b> |
|--------------------------------|
| Acta2                          |
| Myh11                          |
| Myh9                           |
| Myh7                           |
| Myh6                           |
| Myh13                          |
| Myh10                          |
| Myh2                           |
| Myh4                           |
| Myh14                          |
| Myh3                           |
| Myh1                           |
| Tagln                          |
| Smtn                           |
| Mylk                           |
| Vcl                            |
| Des                            |

List of genes used to define contractile SMC.

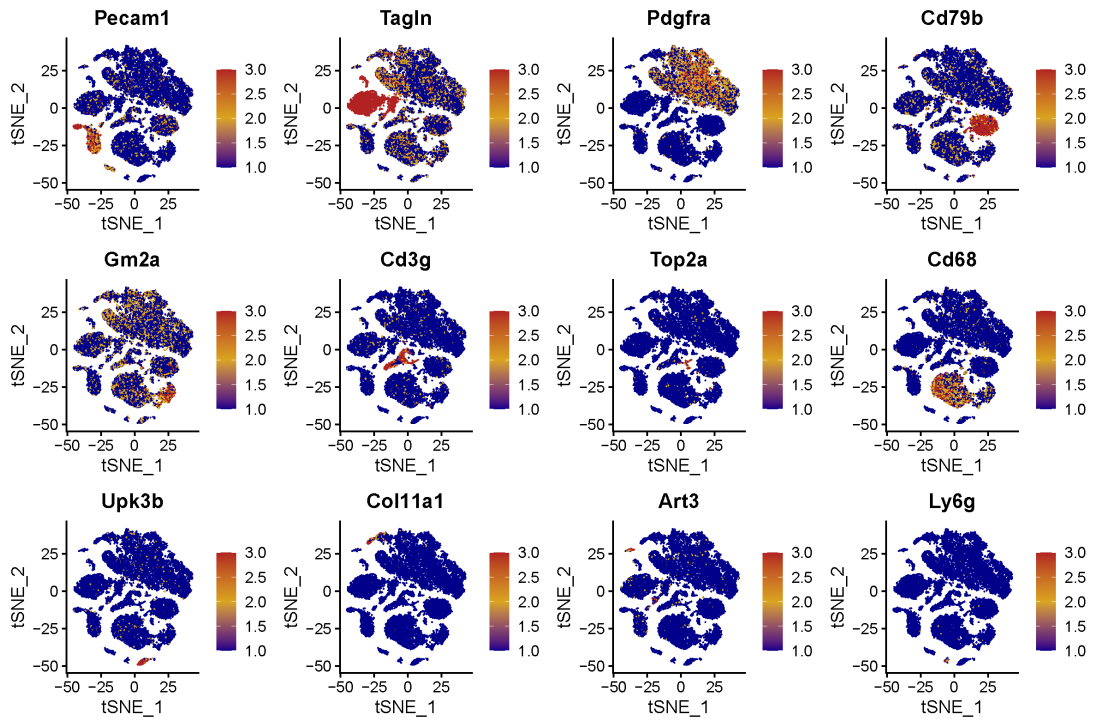

**Supplemental Figure 1 Expression of genes correlated with major cell types onto a t-SNE plot**

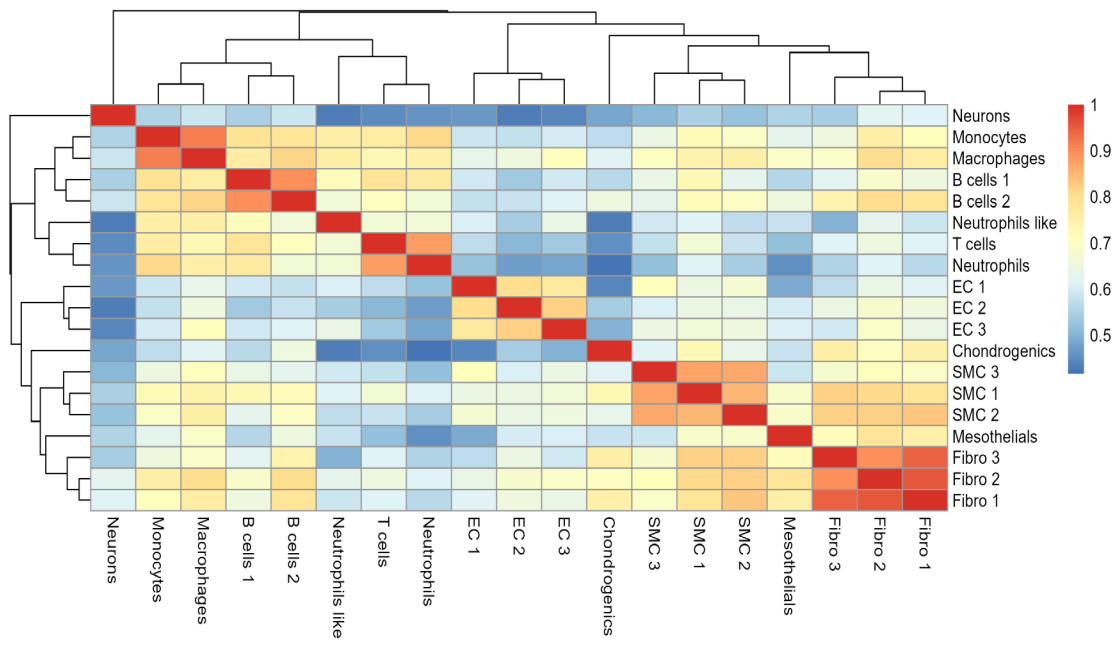

**Supplemental Figure 2 Correlation of 19 cell types in the mouse aortic arch**

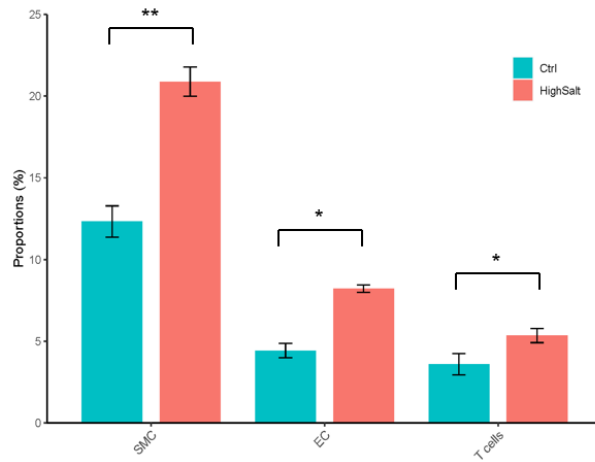

**Supplemental Figure 3 The percentages of the SMC, EC and T cells population from control and high-salt diet mice.** Data are represented as the mean  $\pm$  SEM. \*\* $P < 0.01$  and \* $P < 0.05$  by Student's t test.  $n=4$  control vs.  $n=3$  high-salt diet mice.

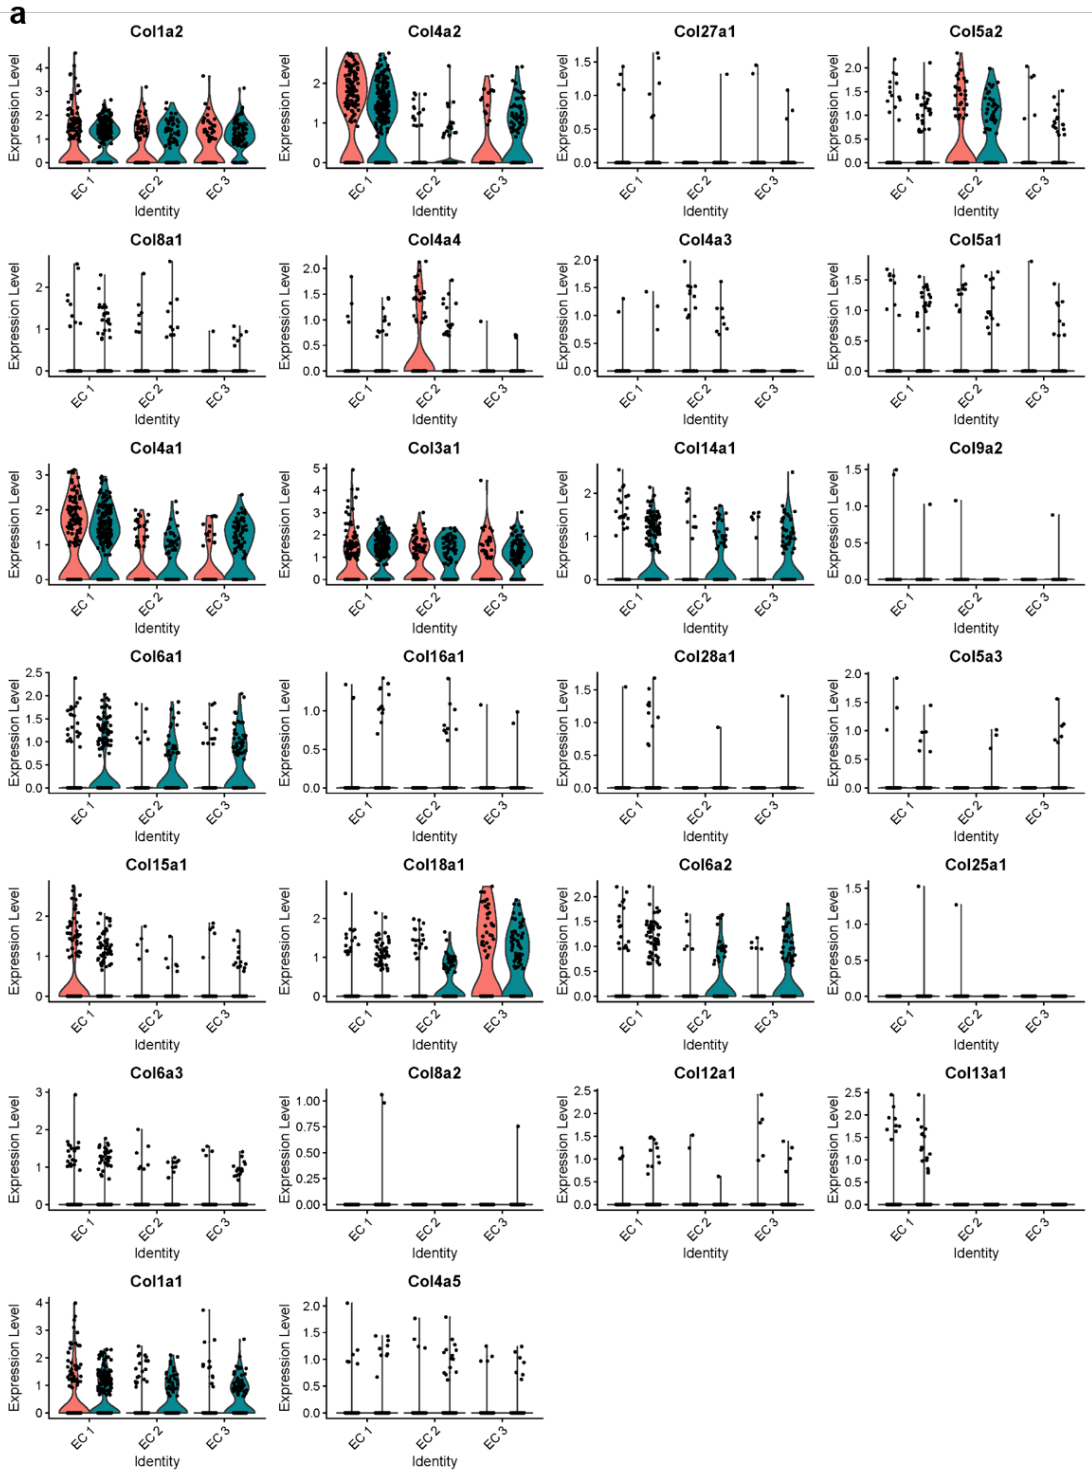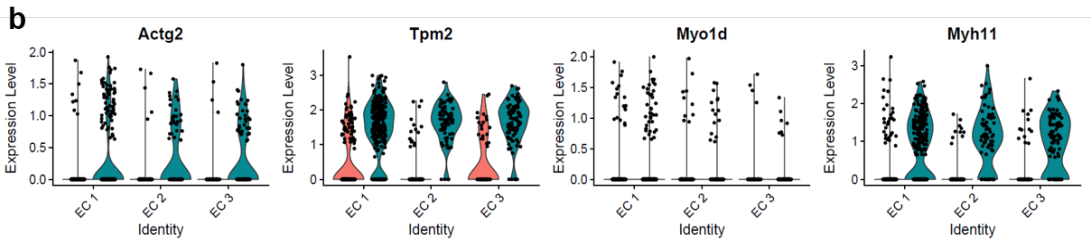



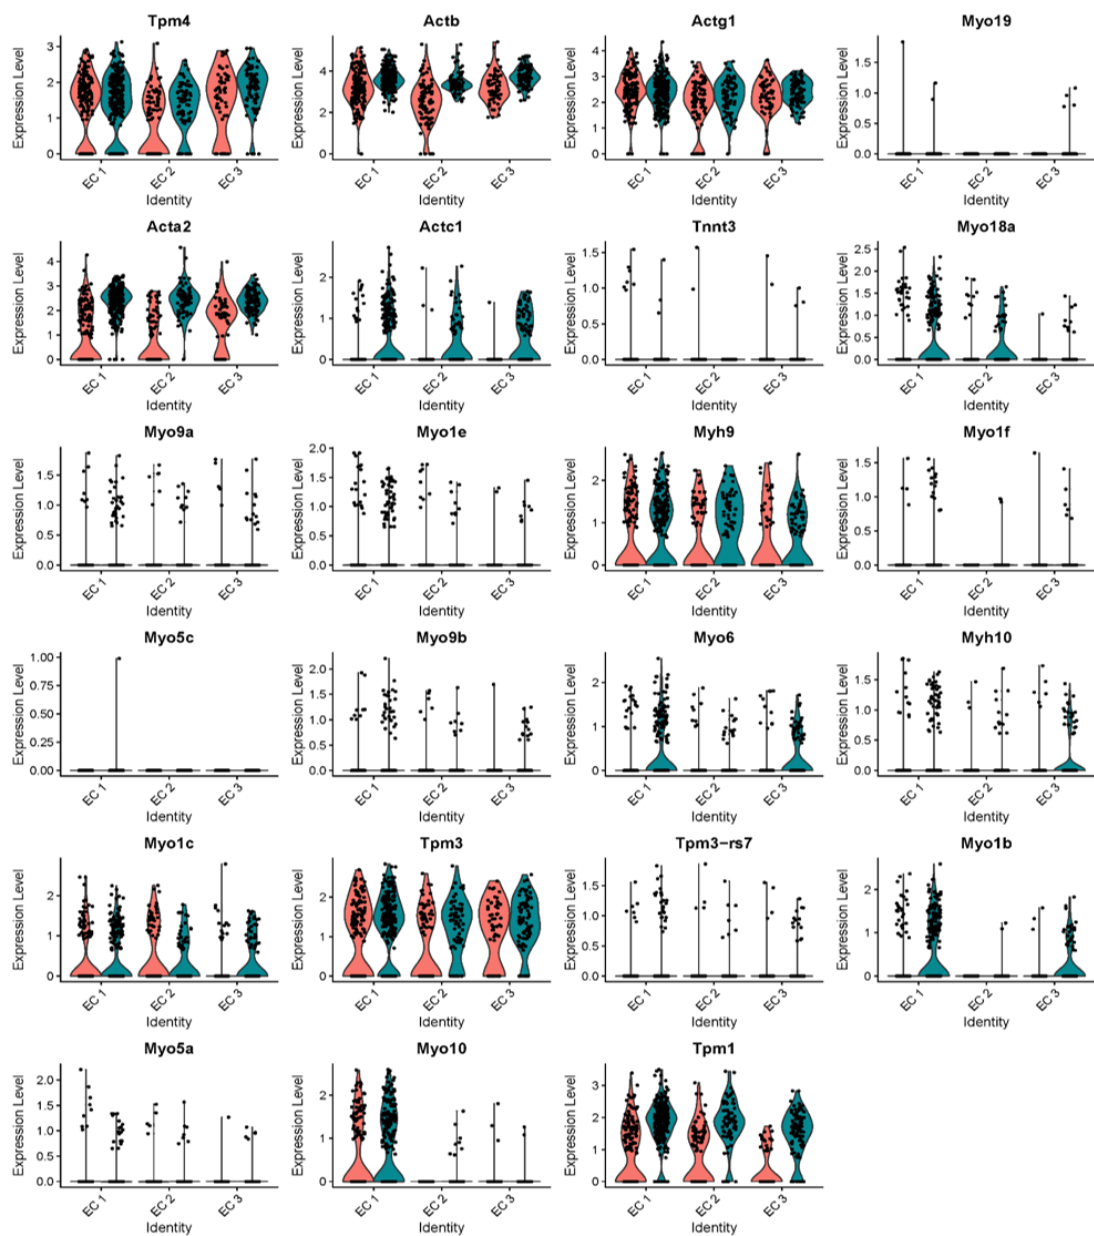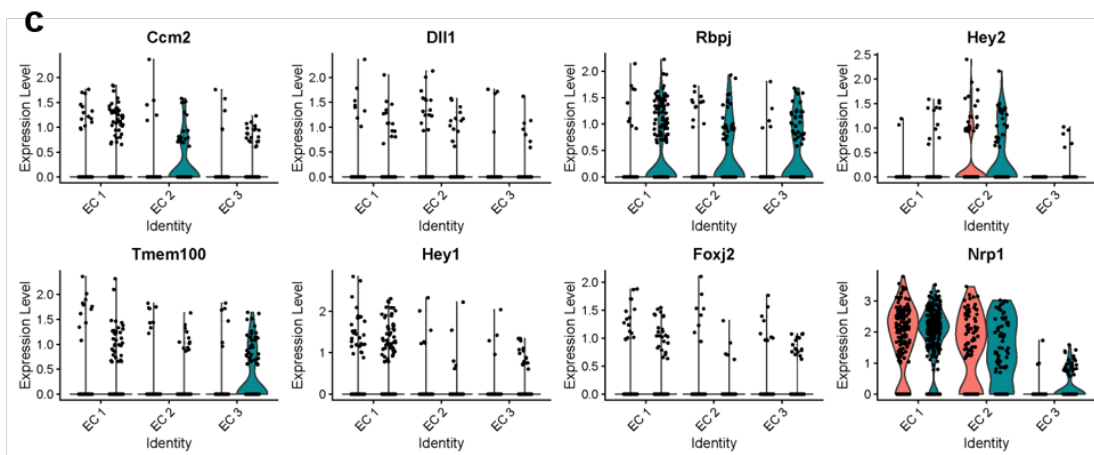

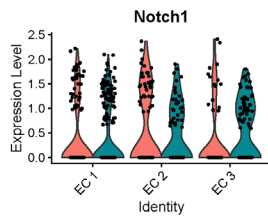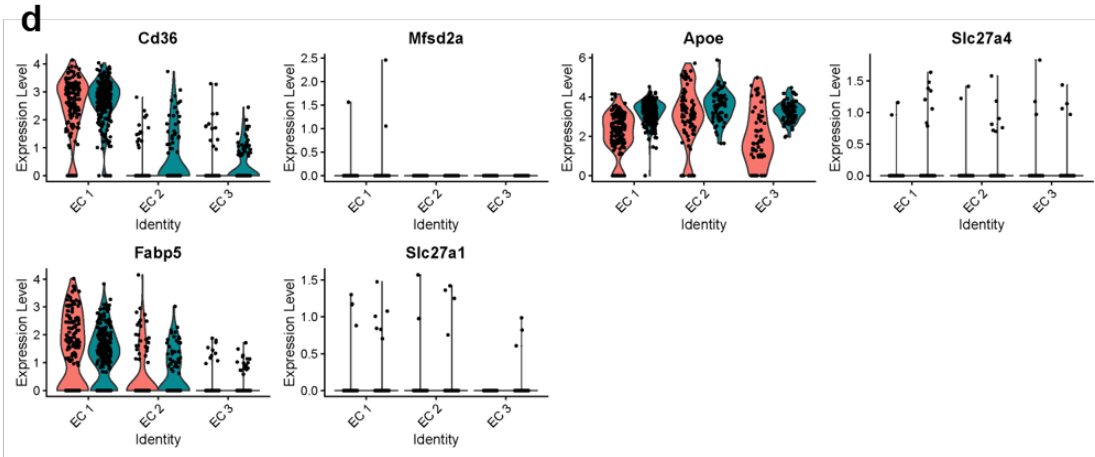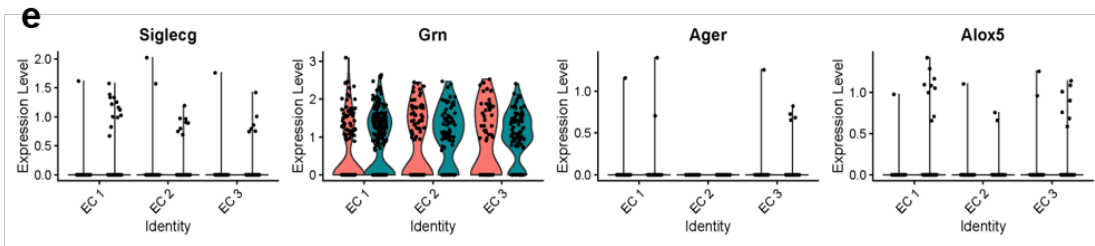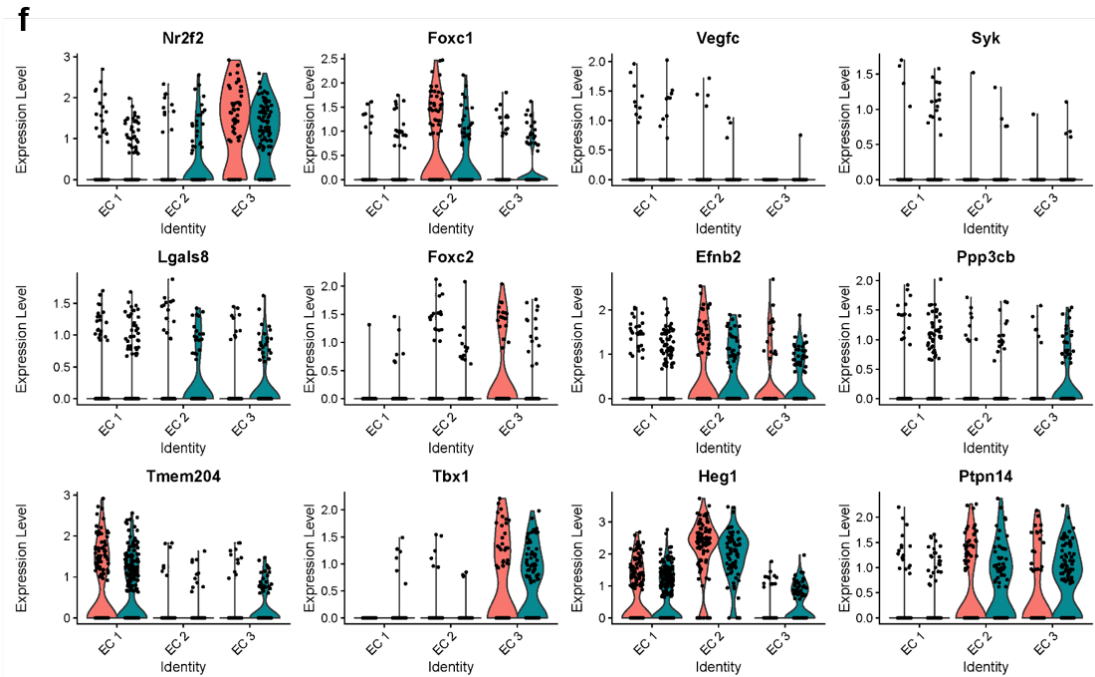

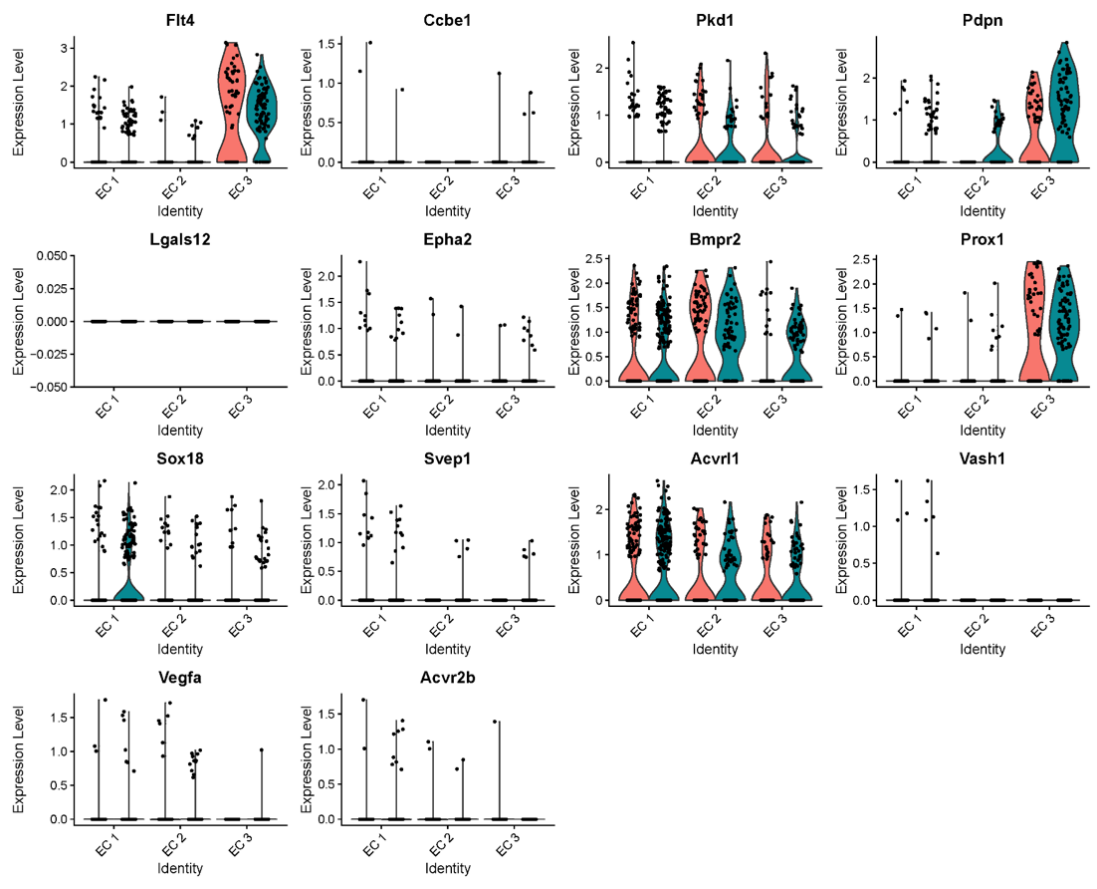

**g**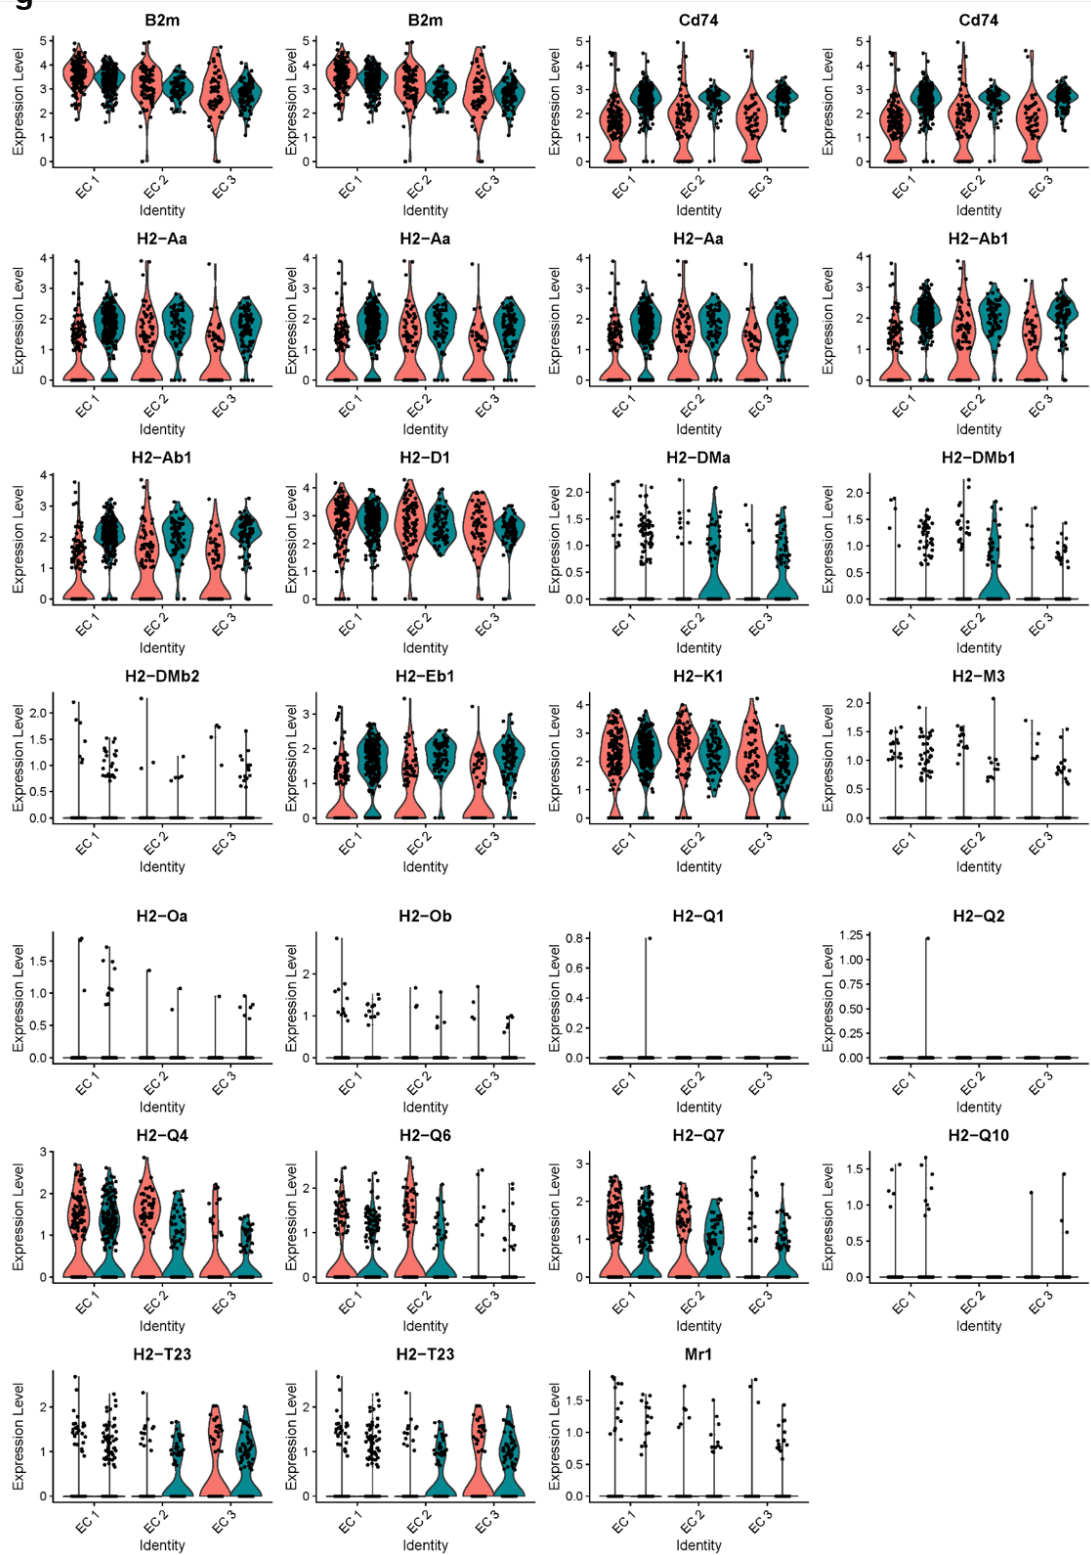

**h**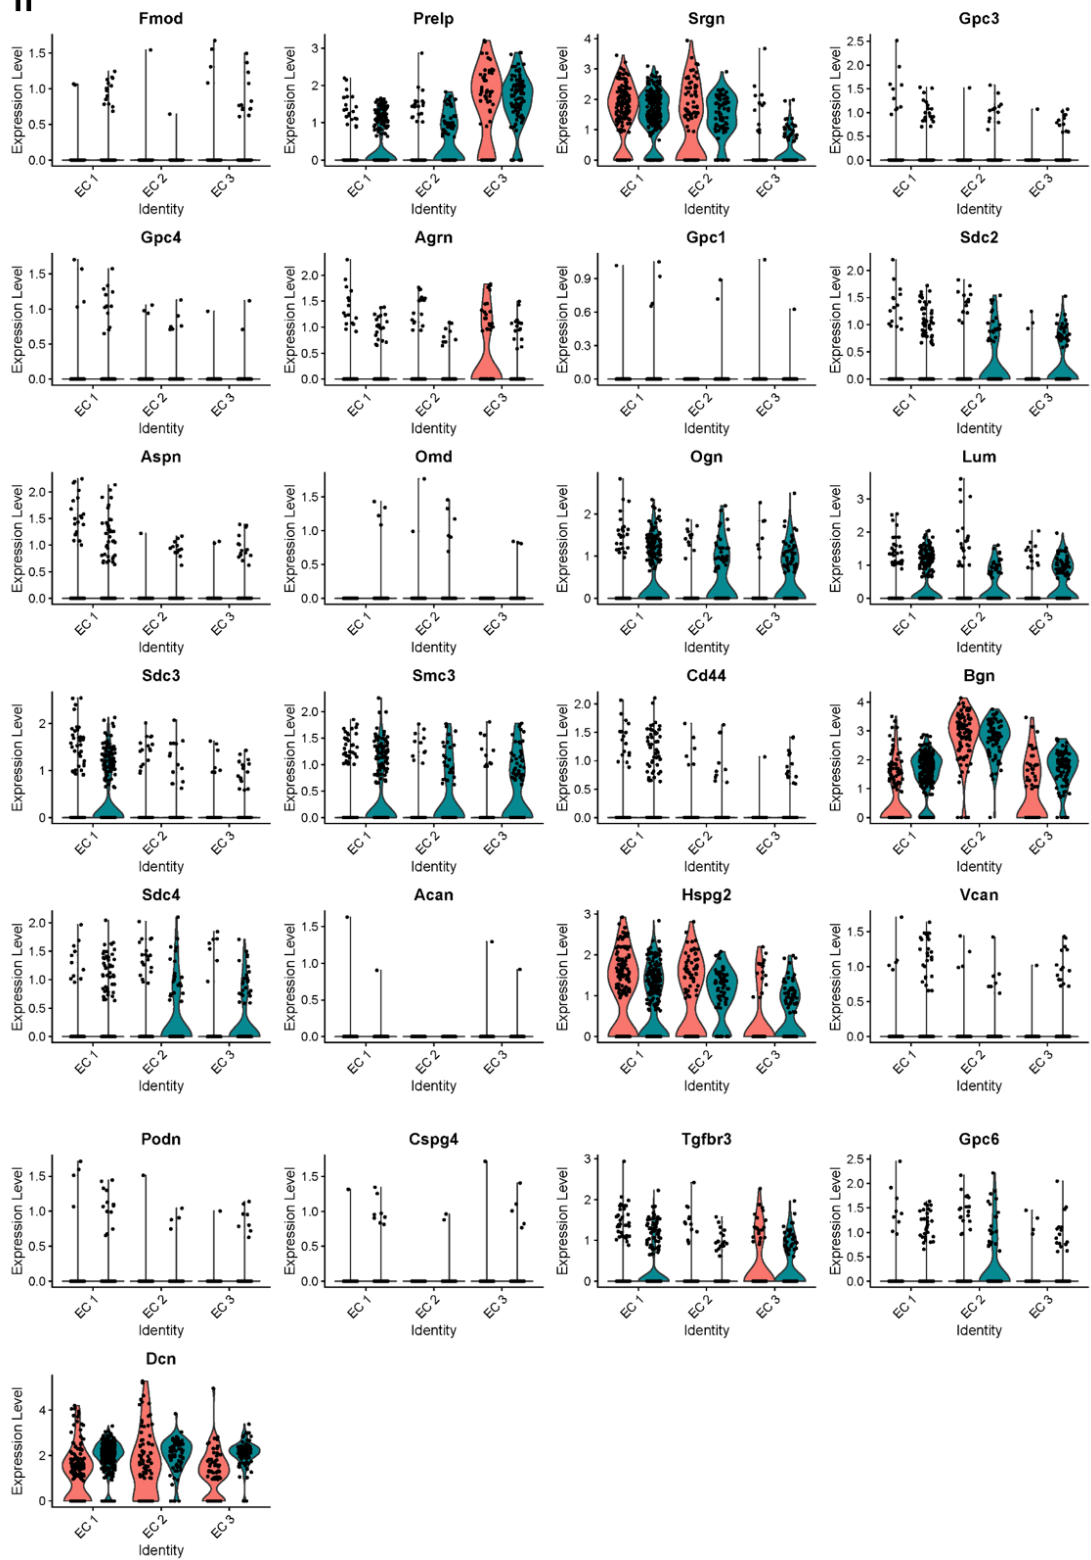

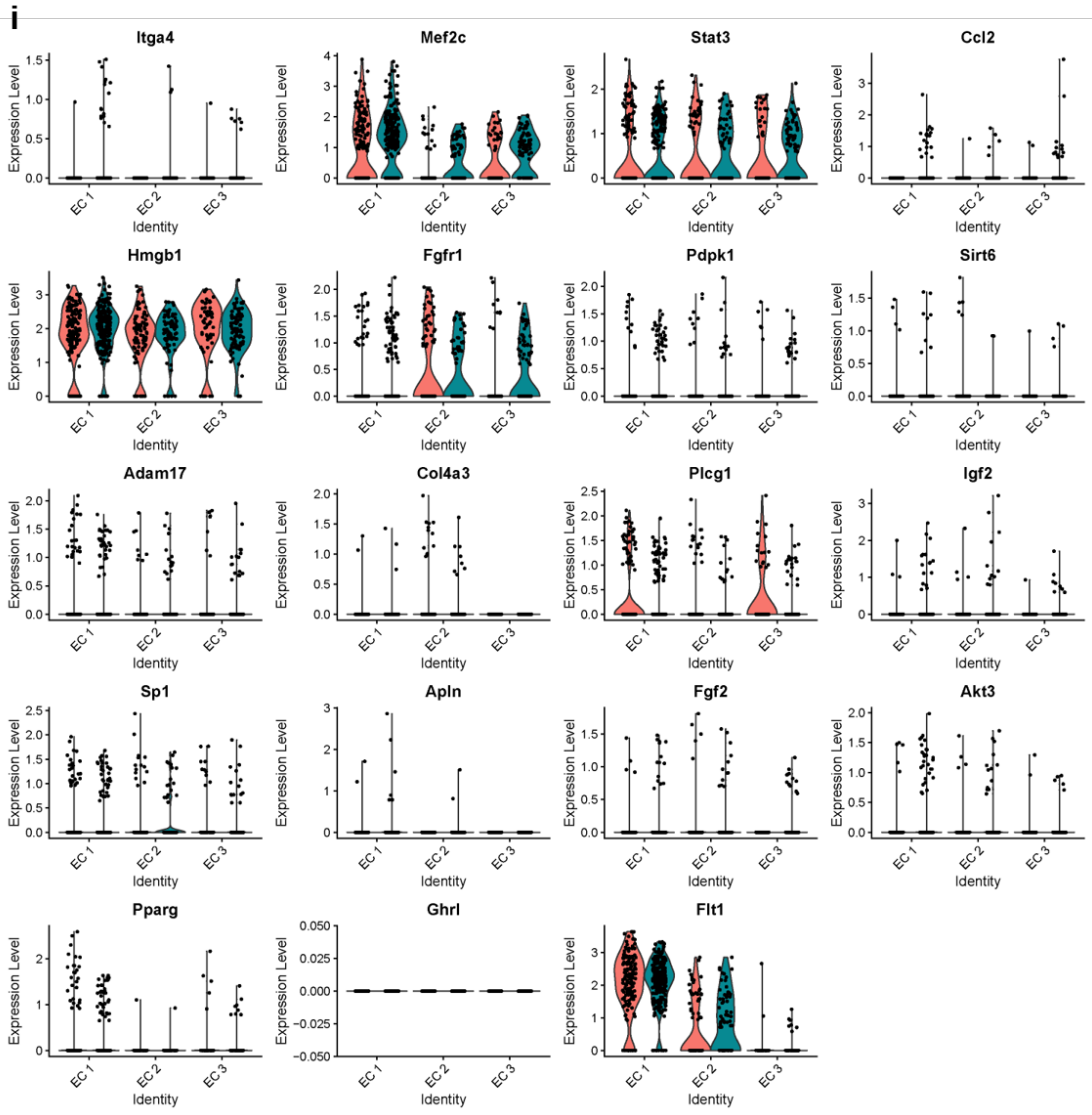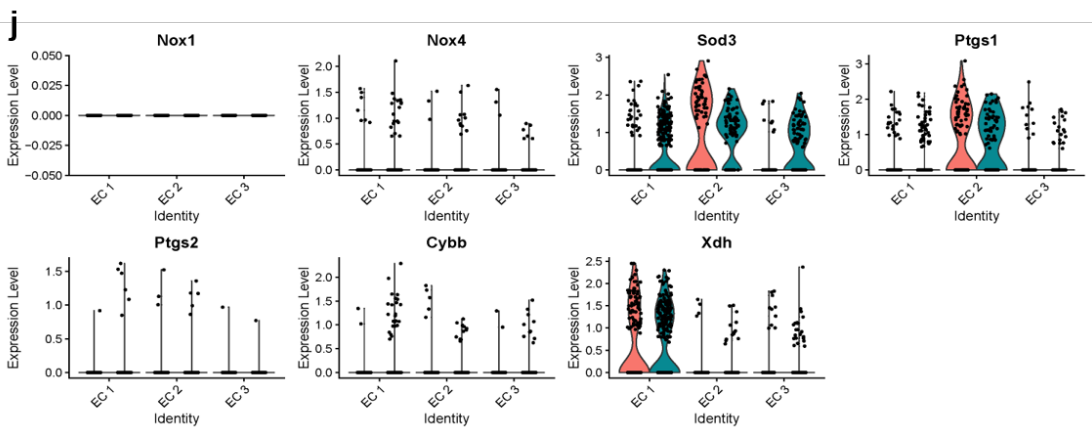

**k**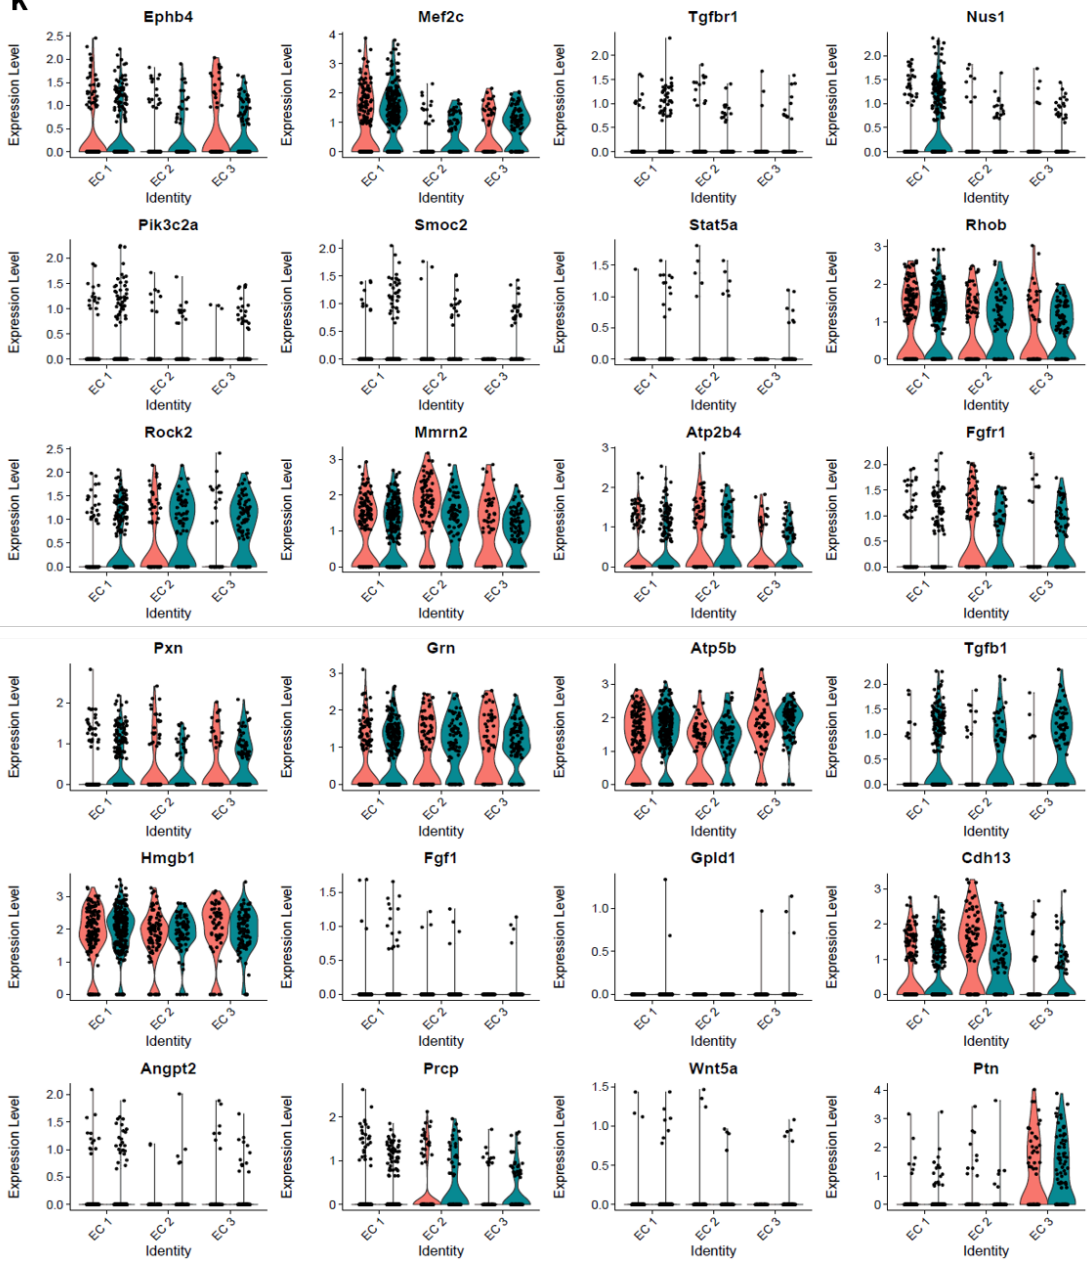

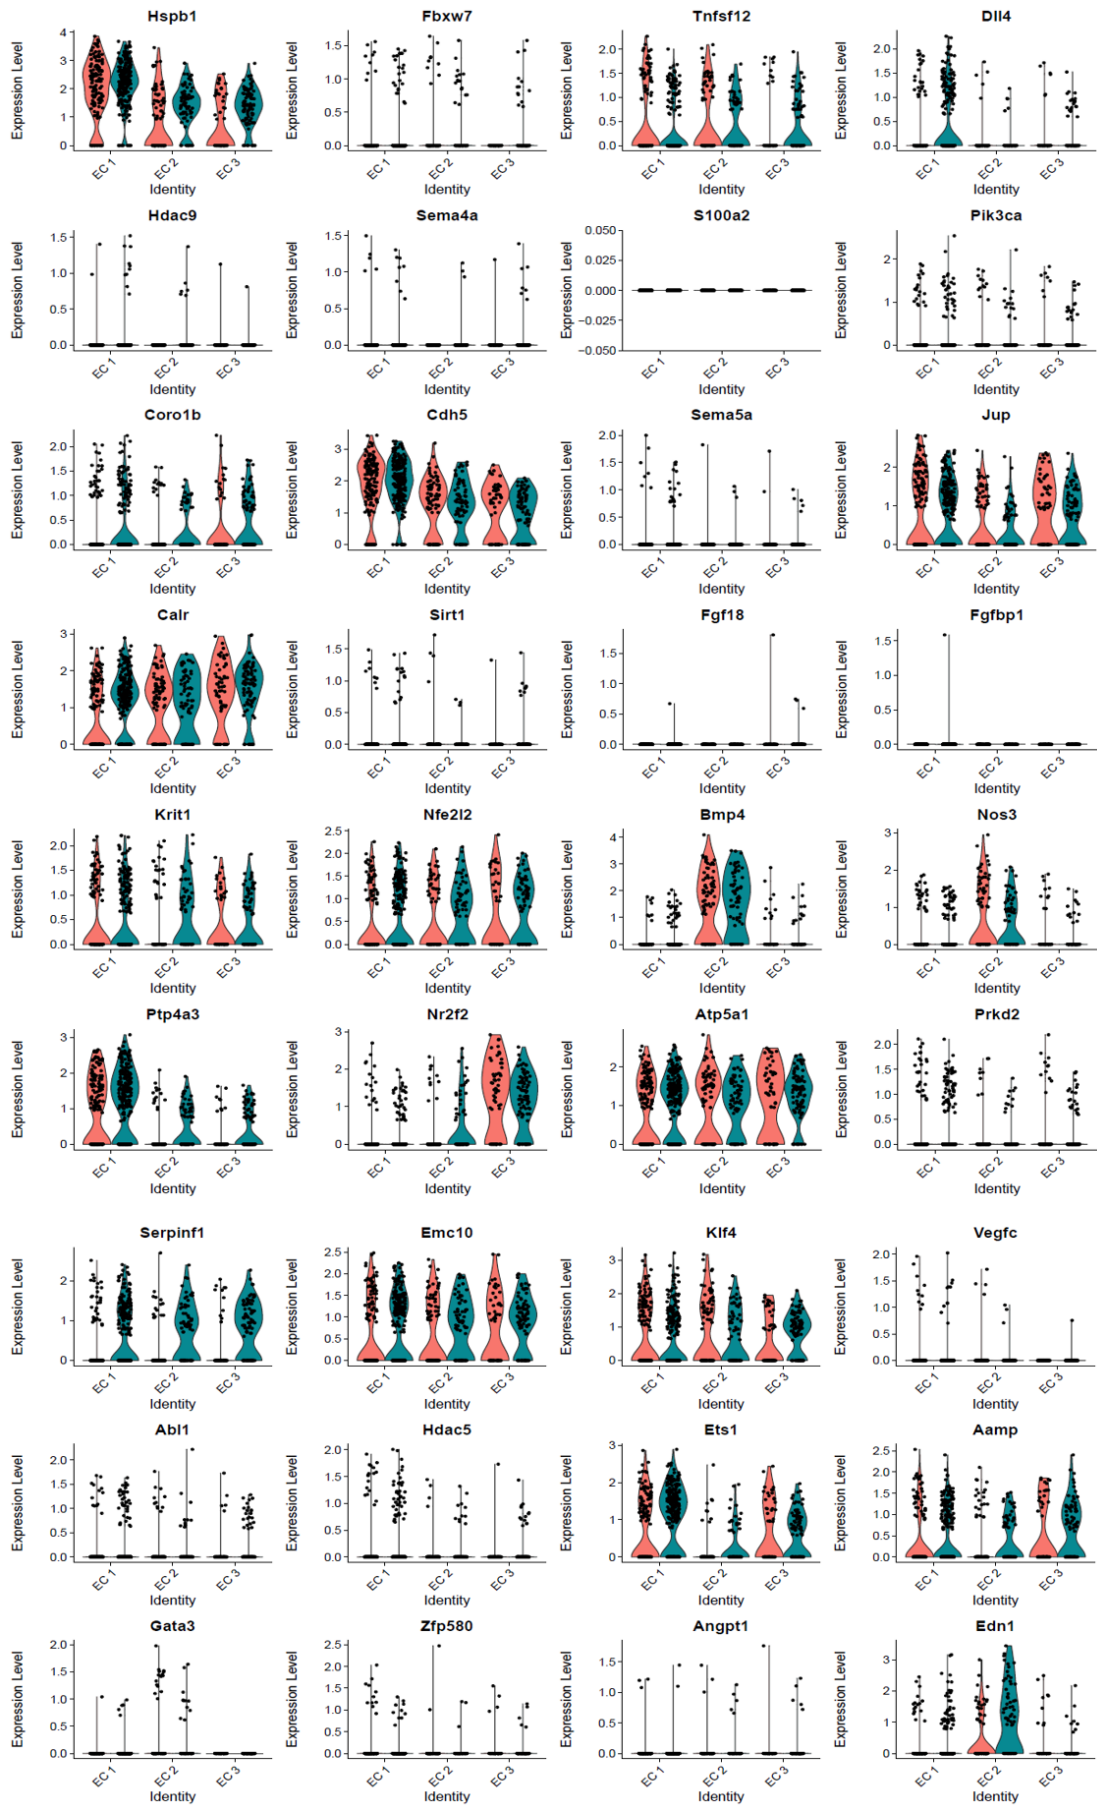



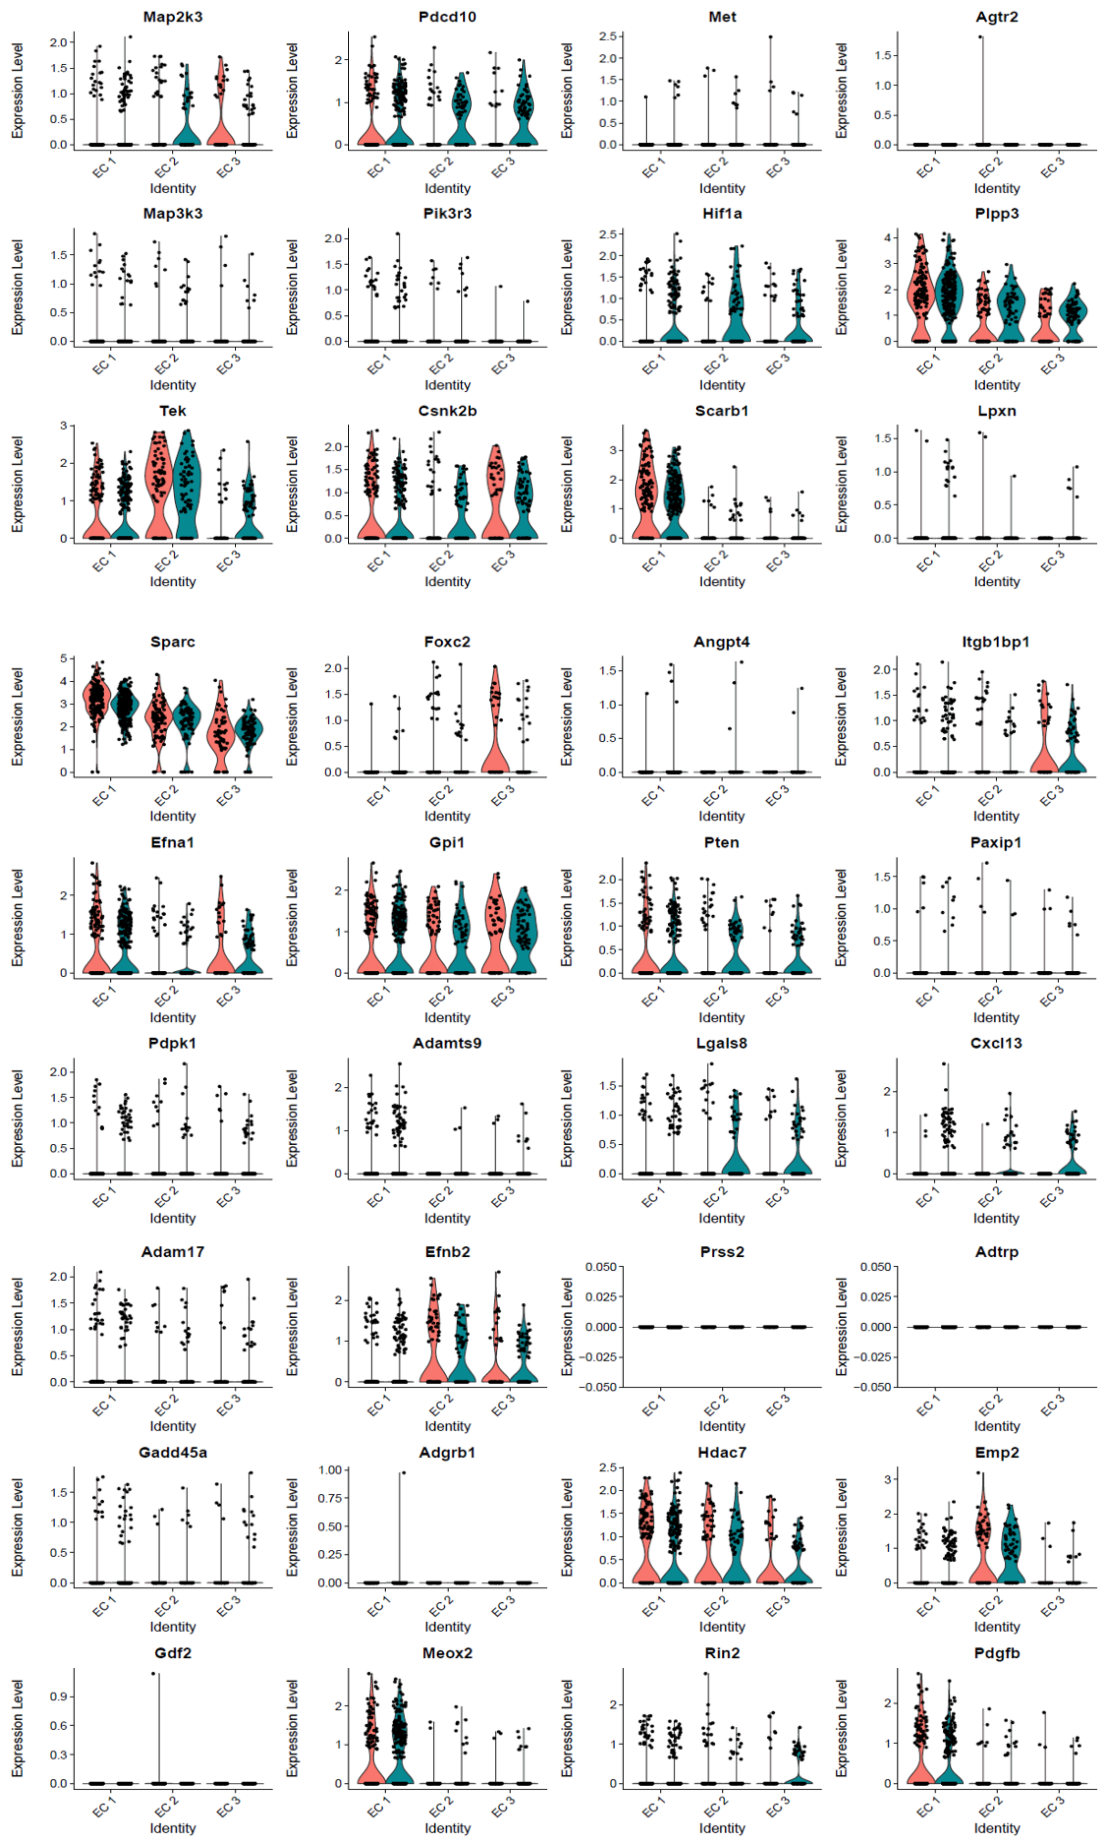

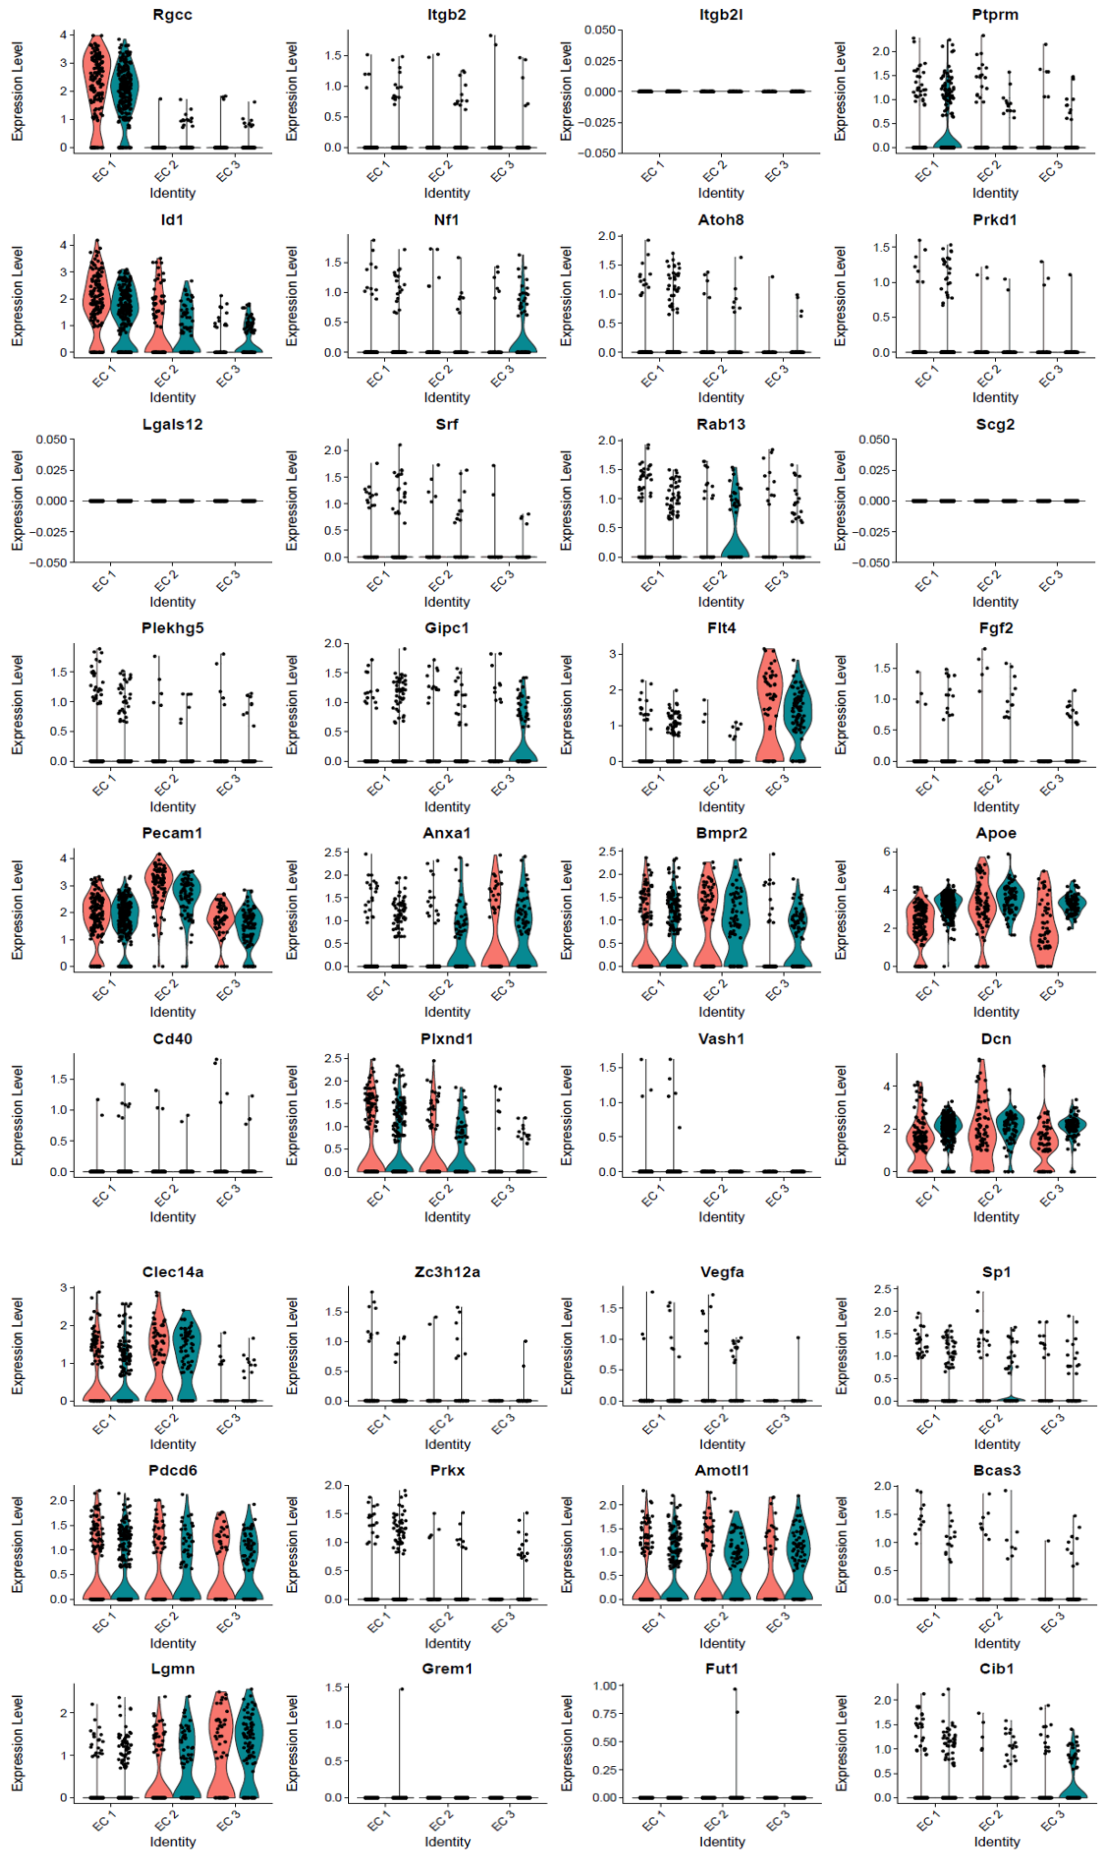

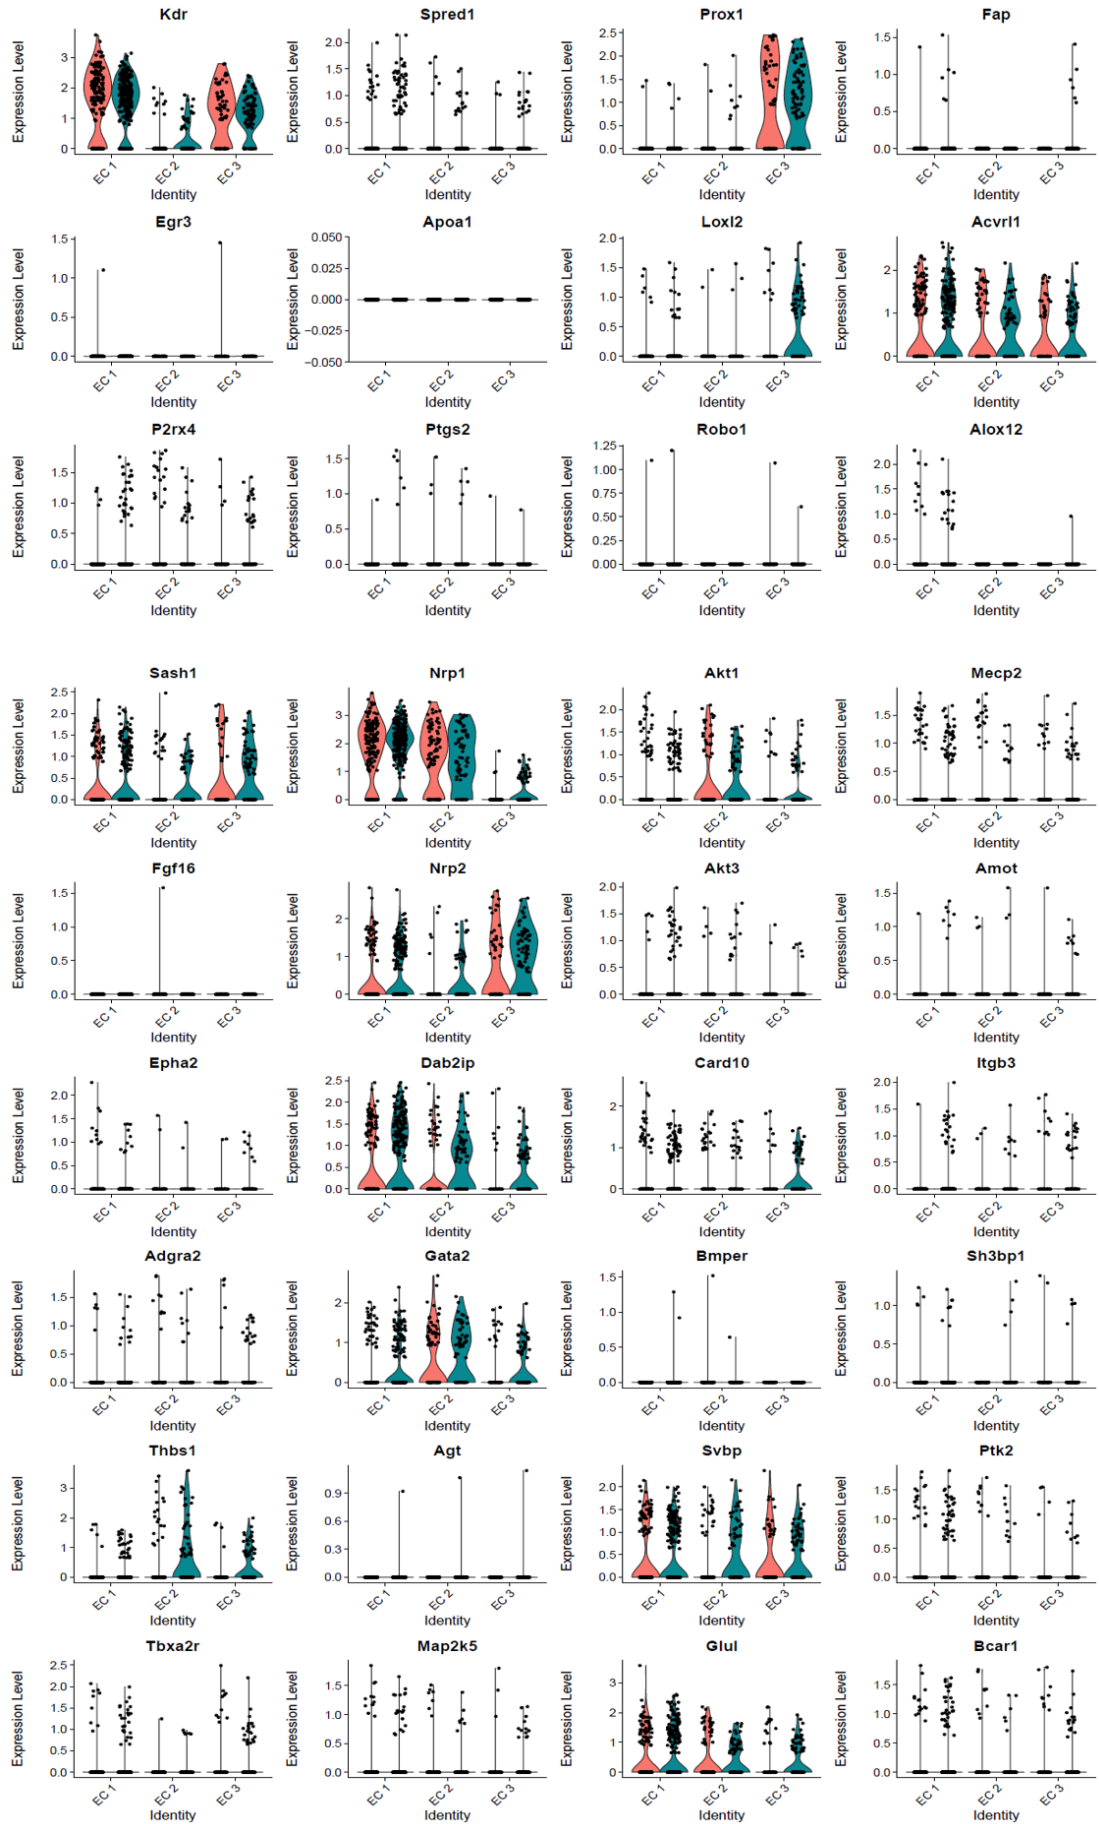

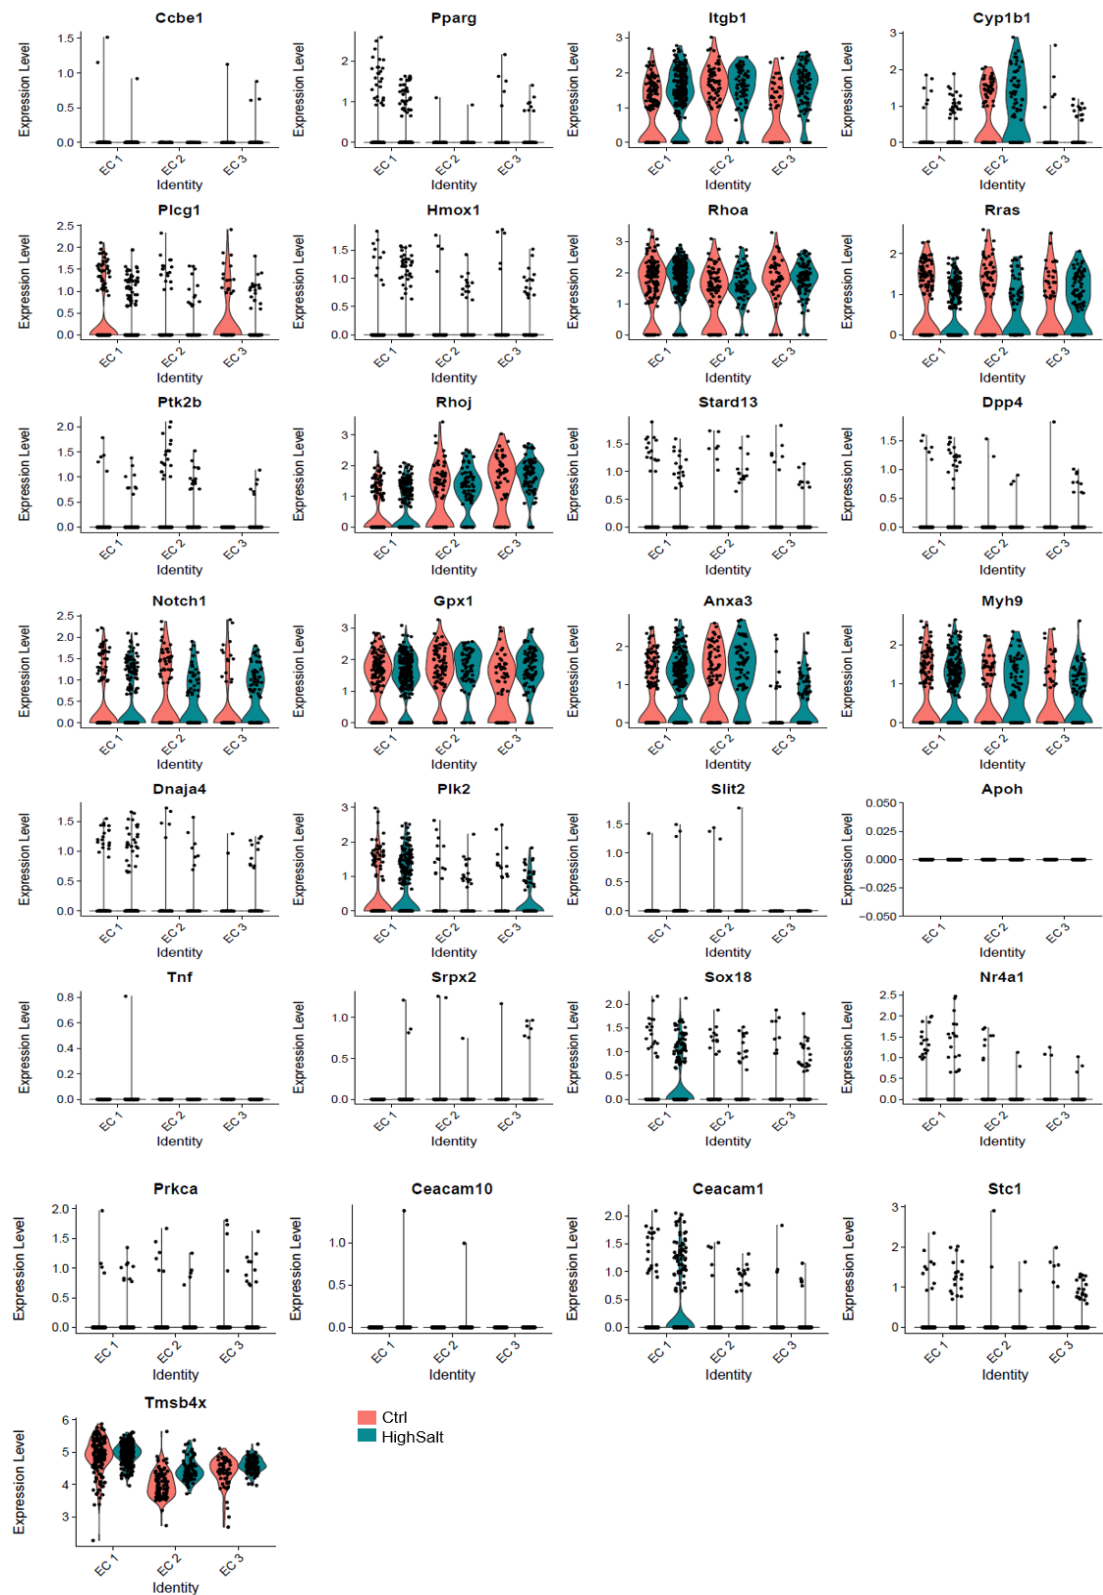

**Supplemental Figure 4 Violin plot showing the expression of genes related to endothelial cell features (or functions). a: Collagen, b: Contractile, c: Differentiation, d: Lipid transport, e: Inflammatory response to wounding, f: Lymph vessel development, g: MHC protein complex, h: Proteoglycan, i: Proliferation, j: ROS-related enzymes, k: Migration.**

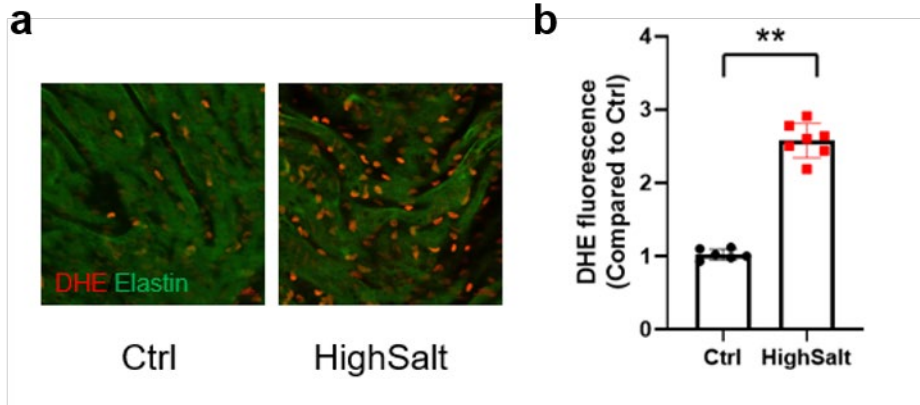

**Supplemental Figure 5 High-salt diet enhanced endothelial reactive oxygen species (ROS) production.** **a** (representative images) and **b** (summarized data), ROS measured by DHE in the en face endothelium of aortae from control and High-salt diet mice. Bar: 20 $\mu$ m. Data are represented as the mean  $\pm$  SEM. \*\*P < 0.01 by Student's t test. n = 6-7.

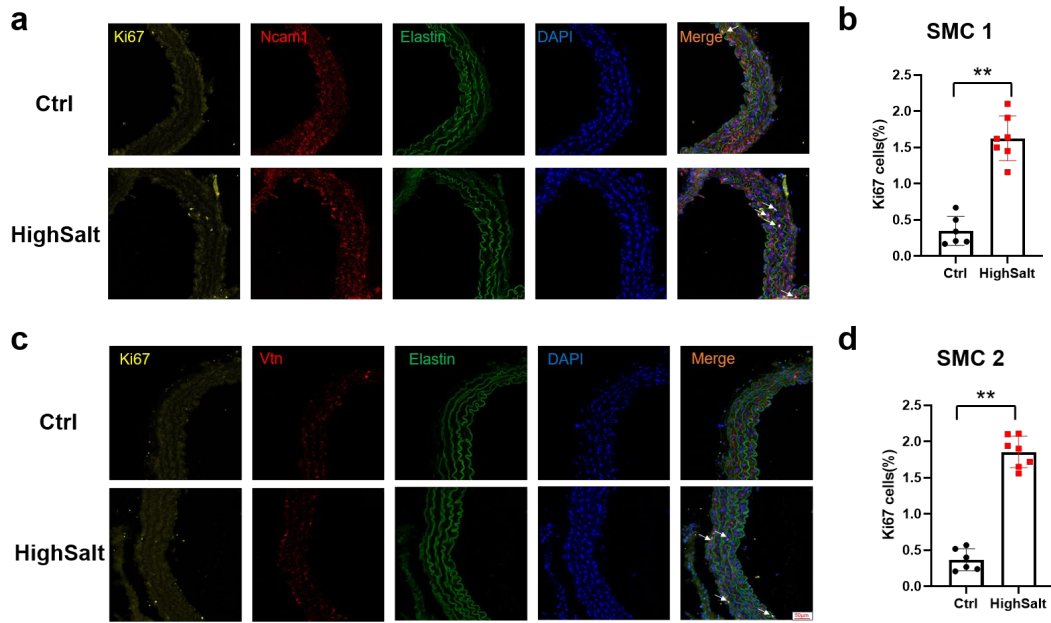

**Supplemental Figure 6 Quantification of double-immunostained cells with Ncam1/Vtn (SMC1/SMC2 marker) and Ki67 markers in aortic arch section. a and c are representative of immunostaining for Ncam1/Vtn (red, SMC1/SMC2) and Ki67 (yellow). b and d are summarized data. DAPI detection of nuclei is represented in blue, and green represents elastin autofluorescence. Arrows point to proliferating SMC. Scale bar: 50  $\mu$ m. Data are represented as the mean  $\pm$  SEM. \*\*P < 0.01 by Student's t test. n = 6-8.**

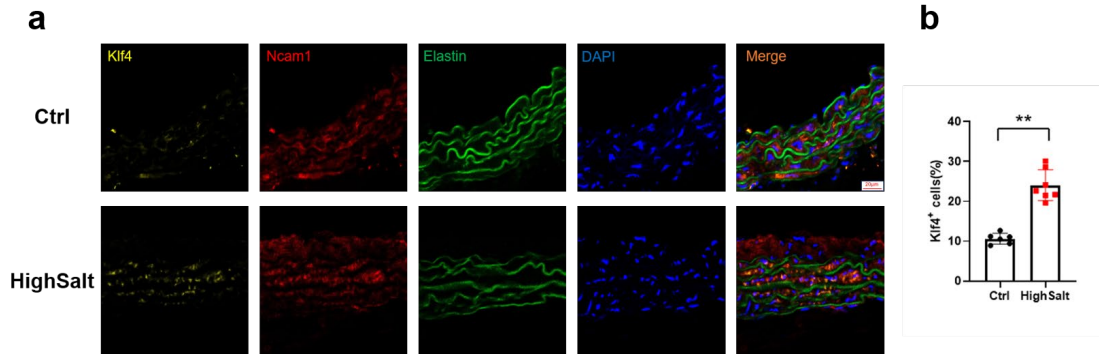

**Supplemental Figure 7 High-salt diet induces increased Klf4 expression in SMC**  
**(a)** Representative of immunostaining for Ncam1 (red, SMC1) and Klf4(yellow). **(b)** Summarized data. DAPI detection of nuclei is represented in blue, and green represents elastin autofluorescence; scale bar: 20  $\mu$ m. Data are represented as the mean  $\pm$  SEM. \*\*P < 0.01 by Student's t test. n = 6-8.

**a**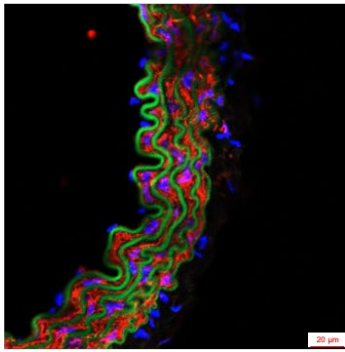**Ctrl**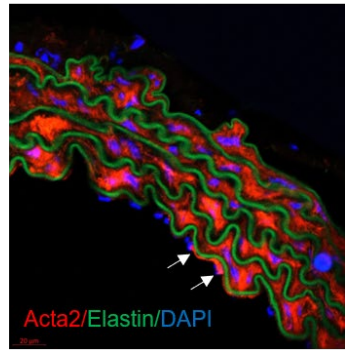**HighSalt****b**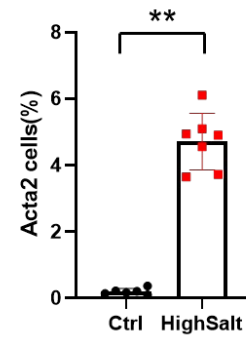

**Supplemental Figure 8 Examples of ACTA2 expression in monolayers of cells lining the vasculature on histological sections of the aortic arch in control and high-salt diet mice. a** (representative images) and **b** (summarized data). Arrows point to Acta2-expressing endothelial cells. Scale bar: 20  $\mu\text{m}$ . Data are represented as the mean  $\pm$  SEM. \*\* $P < 0.01$  by Student's t test.  $n = 6-8$ .



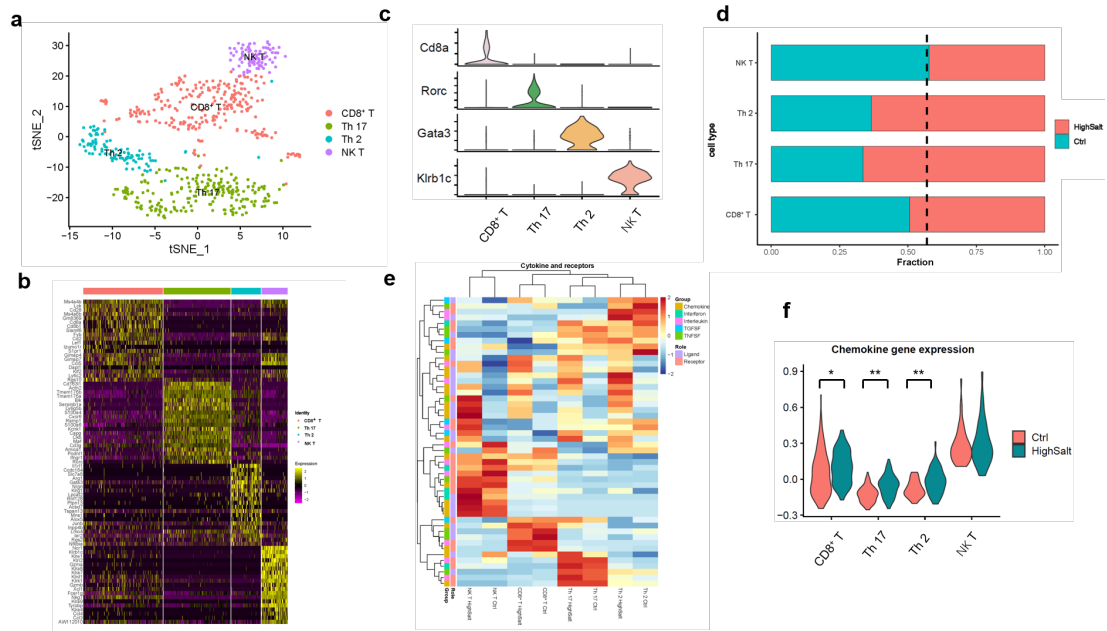

**Supplemental Figure 9 Characteristics of aortic T cells and their changes in Hypertension.** (a) t-SNE plots of the T cells subpopulations from control and hypertensive tissue (control, n = 447 cells. hypertension, n = 587 cells. CD8<sup>+</sup>T, n= 390 cells; Th17, n= 364 cells; Th2, n=159 cells; NK T, n=121 cells). (b) Heatmap showing the top 10 genes [by average Log(fold change)] for each T cells subpopulation. (c) Expression levels of T cells subpopulation marker genes. (d) Bar graph of the composition of each T cells subpopulation (dashed black line, expected proportion of cells in the control group). (e) Mean expression of cytokine and receptors genes in T cluster. (f) Chemokine gene set score of T cells subpopulations differentiates control and hypertensive. \*Mann–Whitney U test P<0.05, \*\*Mann–Whitney U test P<0.01.
